# Supplementary material for: Dendritic Iron(III) Carbazole Complexes: Structural, Optical, and Magnetic Characteristics
Source: MDPI journal article supplement (doi:10.3390/ma14185445), 2021-09-20
Supplement: s1 [file s1]

## SUPPLEMENTARY MATERIALS

# Dendritic Iron(III) Carbazole Complexes: Structural, Optical, and Magnetic Characteristics

Matvey Gruzdev, Ulyana Chervonova, Arkadiy Kolker, Nadezhda Fomina, Ekaterina Zueva, Valerya Vorobeva, Denis Starichenko, and Alexander Korolev

Shimadzu Biotech Axima Confidence 2.9.3.20110624: Mode Reflectron, Power: 55, Blanked, P.Ext. @ 2000 (bin 86)  
%Int. 29 mV[sum= 4321 mV] Profiles 1-150 Smooth Av 5 -Baseline 20

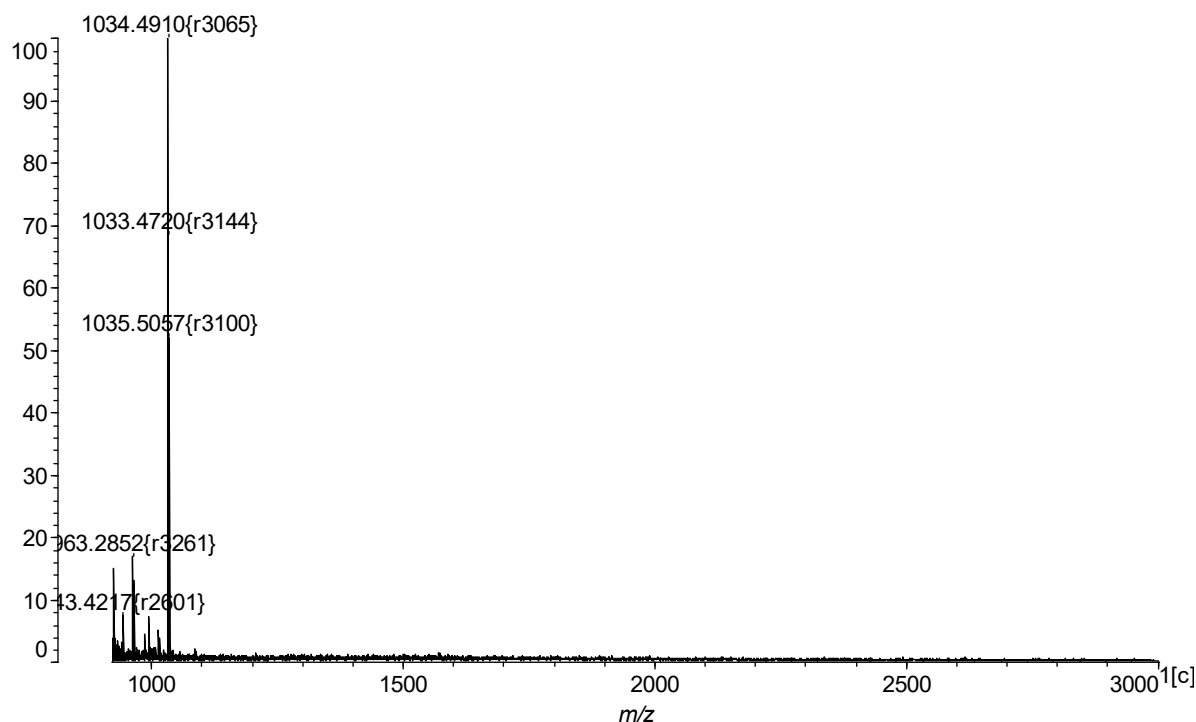

**Figure S1.** Mass spectrum of complex  $[\text{Fe}(\text{L})_2]\text{NO}_3$  (**1**). Similar MS spectra were obtained for other complexes.

This type of MS spectra is typical for all complexes. Chelated compounds with a high degree of branching do not give stable molecular ions, but are completely fragmented in the range of  $m/z$  values from 200 to 2300. The formation of a Schiff base is indicated by the presence of fragmented ions with an  $m/z$  value of  $\sim 1034$   $[\text{L}]^+$ . It was not possible to detect more intense stable molecular ions even when changing the matrix for MALDI-ToF analysis.

## IR-spectra

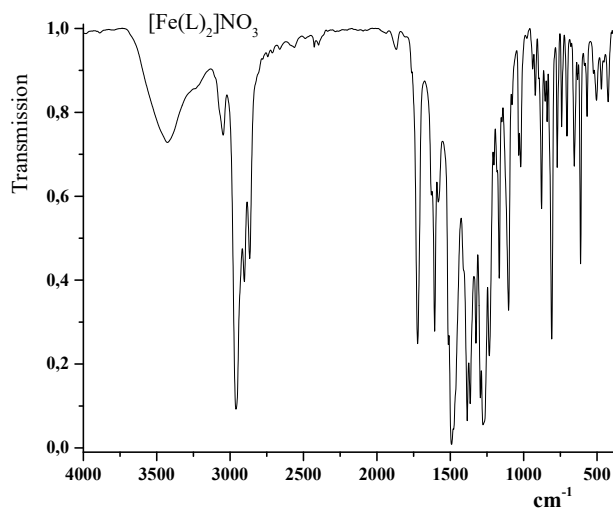

**Figure S2.** FT-IR spectrum of complex  $[\text{Fe}(\text{L})_2]\text{NO}_3$  (**1**), KBr pellet.

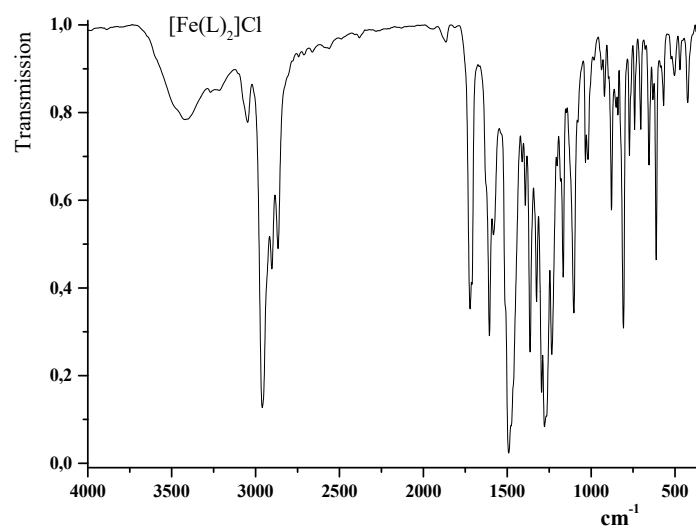

**Figure S3.** FT-IR spectrum of complex  $[\text{Fe}(\text{L})_2]\text{Cl}$  (**2**), KBr pellet.

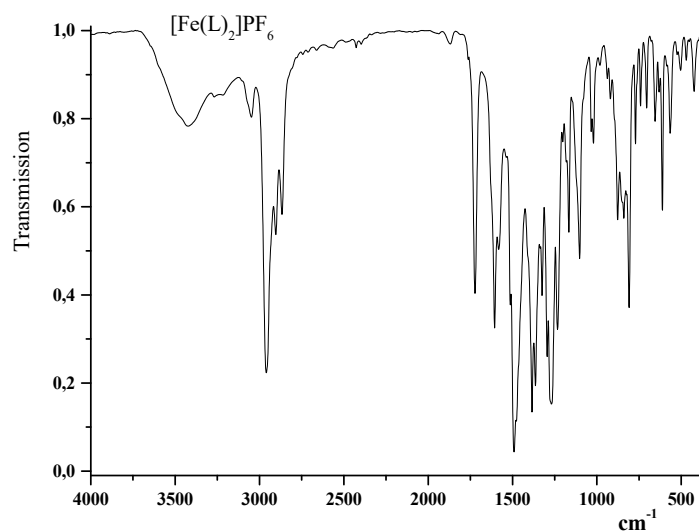

**Figure S4.** FT-IR spectrum of complex  $[\text{Fe}(\text{L})_2]\text{PF}_6$  (**3**), KBr pellet.

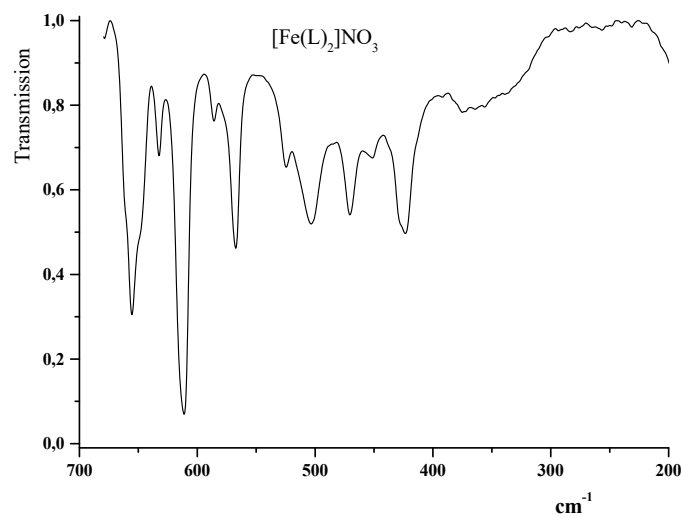

**Figure S5.** Far-IR spectrum of complex  $[\text{Fe}(\text{L})_2]\text{NO}_3$  (1), CsBr pellet.

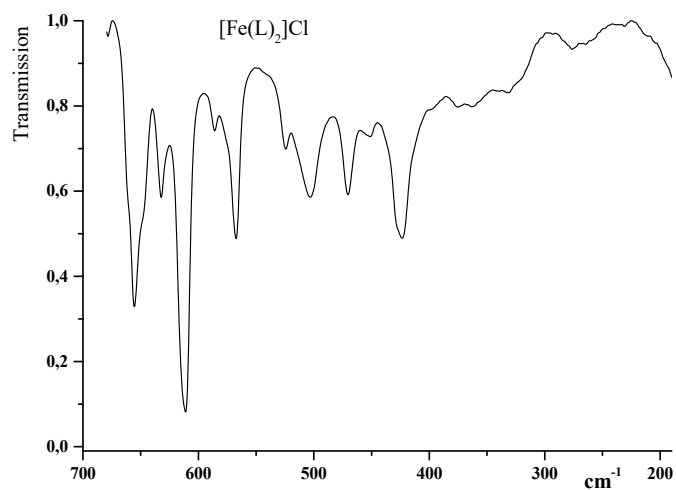

**Figure S6.** Far-IR spectrum of complex  $[\text{Fe}(\text{L})_2]\text{Cl}$  (2), CsBr pellet.

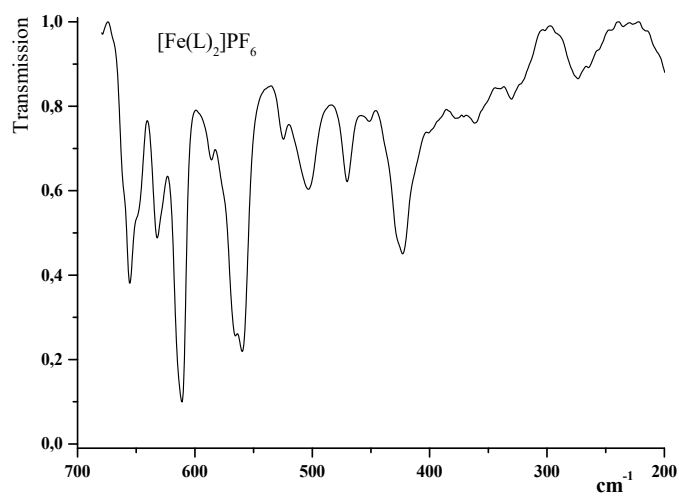

**Figure S7.** Far-IR spectrum of complex  $[\text{Fe}(\text{L})_2]\text{PF}_6$  (3), CsBr pellet.

$^1\text{H}$  NMR spectra

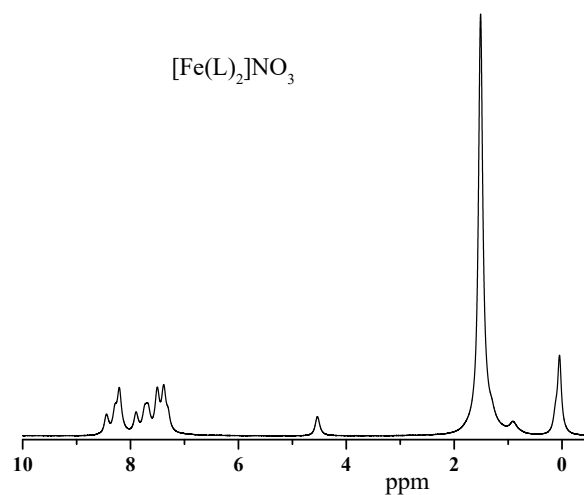

**Figure S8.**  $^1\text{H}$  NMR spectrum of complex  $[\text{Fe}(\text{L})_2]\text{NO}_3$  (**1**),  $\text{CDCl}_3$  solution.

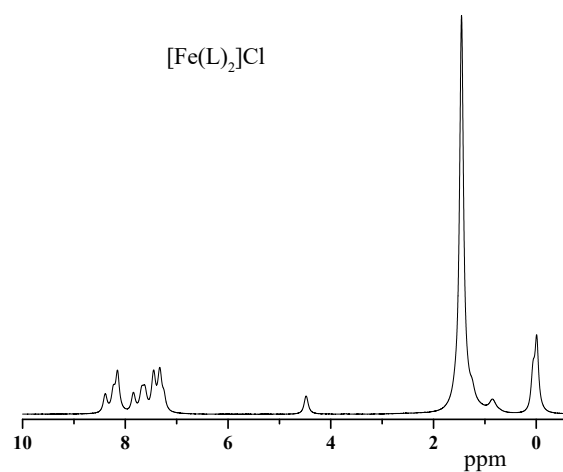

**Figure S9.**  $^1\text{H}$  NMR spectrum of complex  $[\text{Fe}(\text{L})_2]\text{Cl}$  (**2**),  $\text{CDCl}_3$  solution.

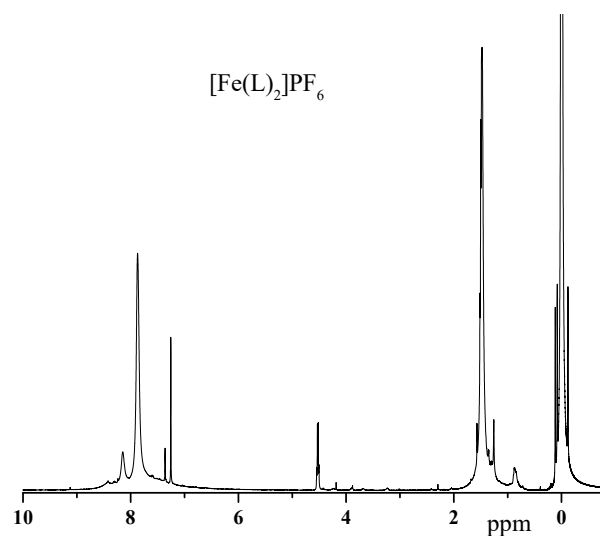

**Figure S10.**  $^1\text{H}$  NMR spectrum of complex  $[\text{Fe}(\text{L})_2]\text{PF}_6$  (**3**),  $\text{CDCl}_3$  solution.

## DSC/TG curves

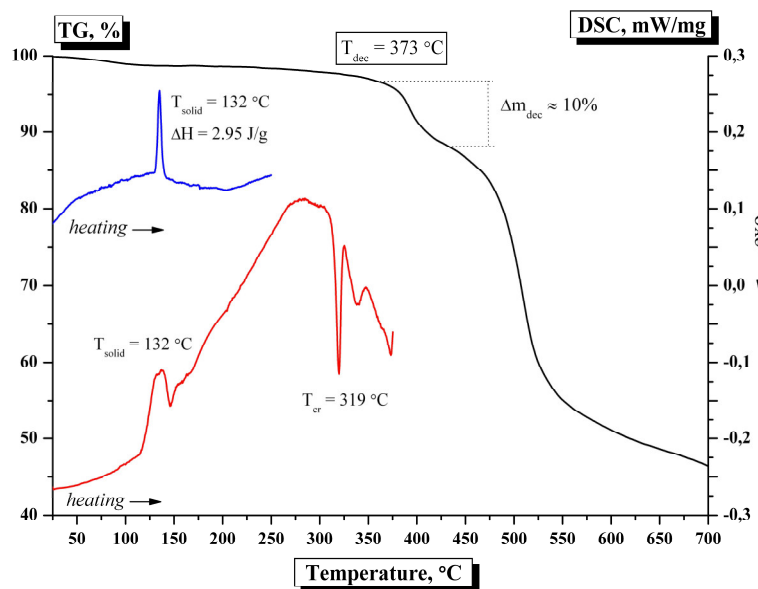

**Figure S11.** TG, DSC curves (heating cycle) of complex 1.

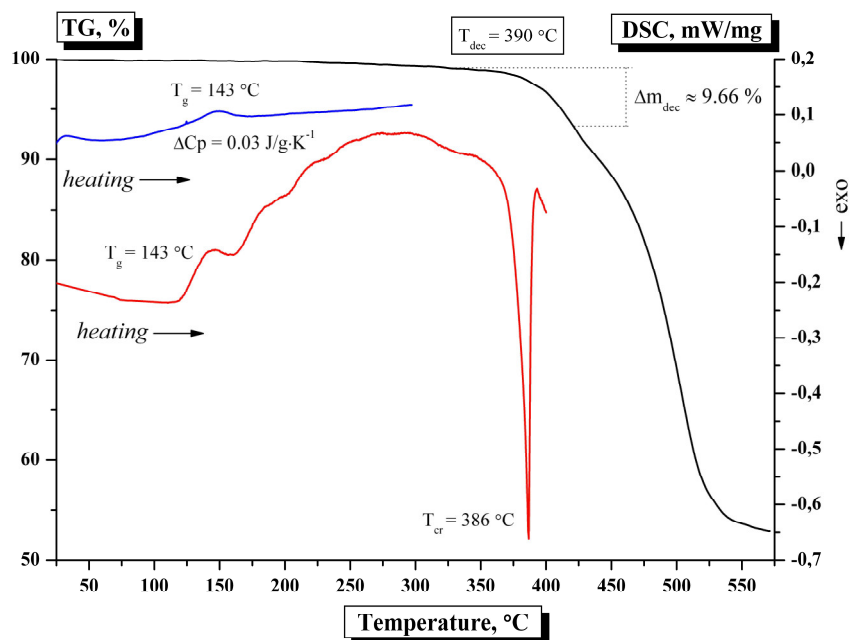

**Figure S12.** TG, DSC curves (heating cycle) of complex 2.

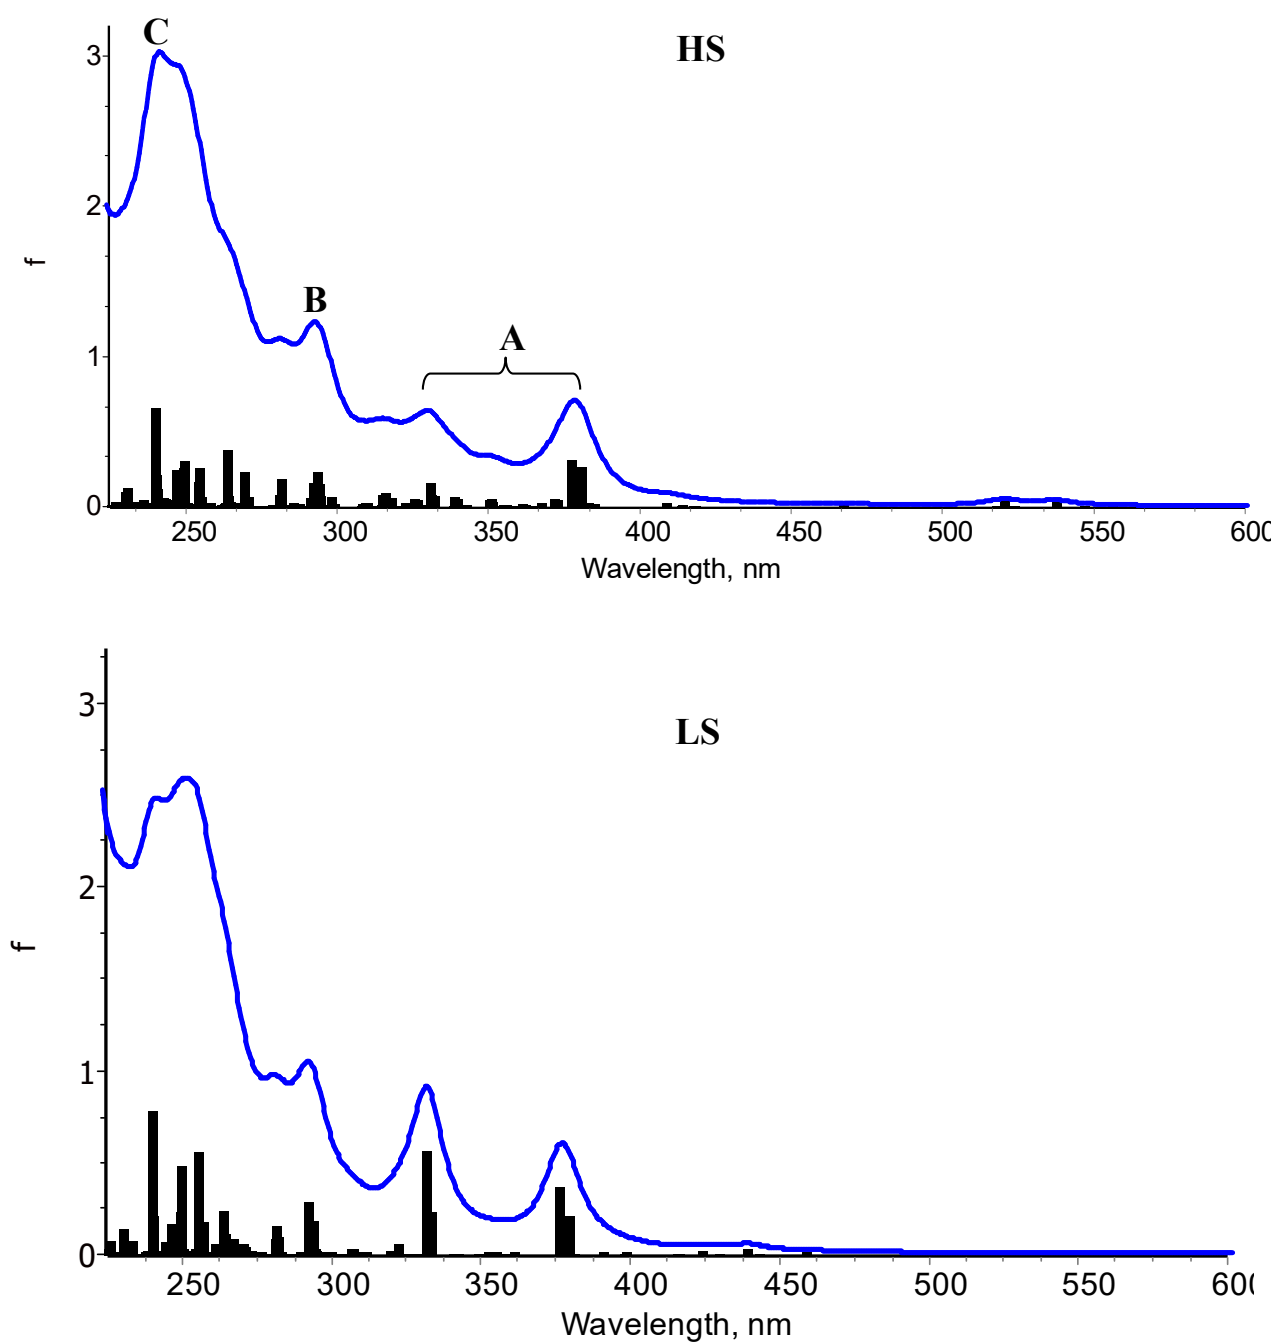

**Figure S13.** The calculated absorption spectra for the *mer* isomer in HS ( $S = 5/2$ ) and LS ( $S = 1/2$ ) states. The vertical lines showing the position of electronic transitions and their intensity ( $f$  – oscillator strength) were broadened by the Lorentz function.

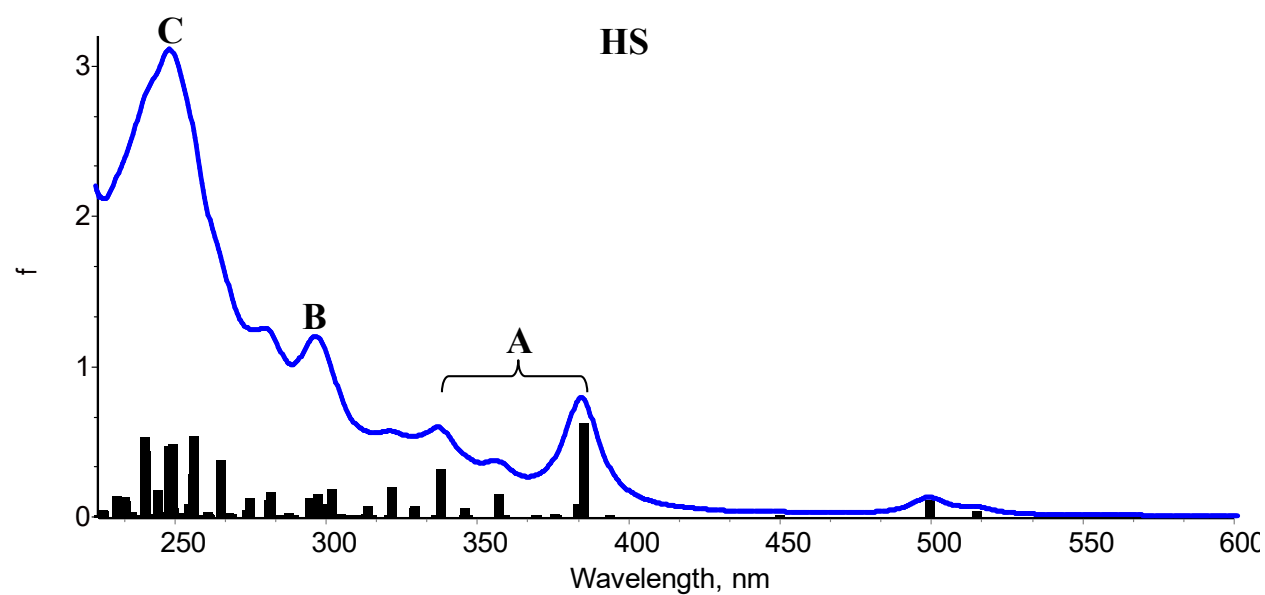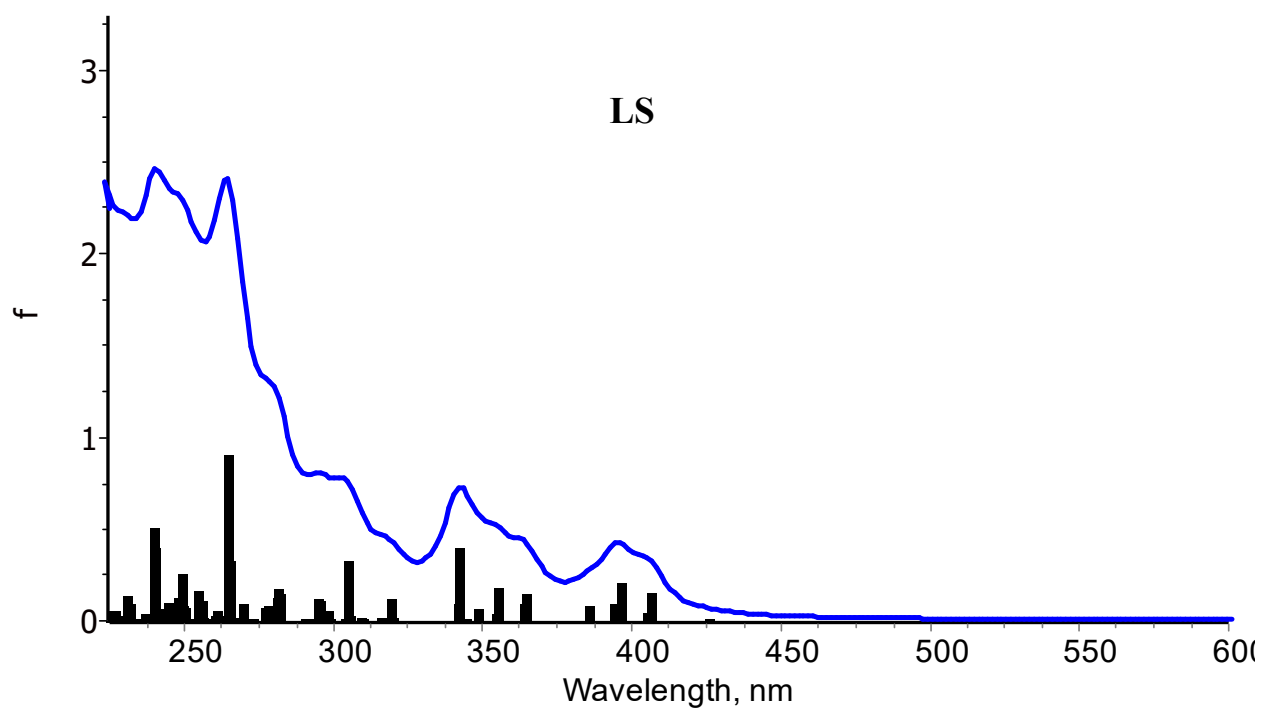

**Figure S14.** The calculated absorption spectra for the *fac* isomer in HS ( $S = 5/2$ ) and LS ( $S = 1/2$ ) states. The vertical lines showing the position of electronic transitions and their intensity ( $f$  – oscillator strength) were broadened by the Lorentz function.

**Table S1.** The calculated excitation energies (absorption wavelengths), oscillator strengths, natural transition orbital (NTO) pairs and their eigenvalues (occupations) for selected excited states of the *mer* isomer (HS state).

| $\lambda$ | $f$  | Type         | Assignment                                                                                           |          | Occ  | NTO pair                                                                             |  |
|-----------|------|--------------|------------------------------------------------------------------------------------------------------|----------|------|--------------------------------------------------------------------------------------|--|
| 380       | 0.27 | ILCT<br>LMCT | $\pi_{\text{carb}} \rightarrow \pi_{\text{benz}}^*$                                                  | $\alpha$ | 0.20 | 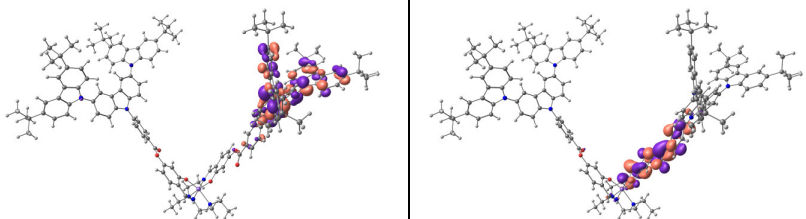   |  |
|           |      |              | $\pi_{\text{carb}} \rightarrow \pi_{\text{sal}}^*$                                                   |          |      |    |  |
|           |      |              | $\pi_{\text{carb}} \rightarrow d_{\text{Fe}}$                                                        | $\beta$  | 0.24 |    |  |
|           |      |              | $\pi_{\text{carb}} \rightarrow \pi_{\text{benz}}^*$<br>$\pi_{\text{sal}} \rightarrow d_{\text{Fe}}$  |          | 0.15 |  |  |
|           |      |              | $\pi_{\text{carb}} \rightarrow \pi_{\text{benz}}^*$<br>$\pi_{\text{carb}} \rightarrow d_{\text{Fe}}$ |          | 0.13 |  |  |
| 378       | 0.31 | ILCT<br>LMCT | $\pi_{\text{carb}} \rightarrow \pi_{\text{benz}}^*$                                                  | $\alpha$ | 0.23 |  |  |
|           |      |              | $\pi_{\text{carb}} \rightarrow \pi_{\text{sal}}^*$                                                   |          | 0.19 |  |  |



|     |      |              |                                                                                                           |          |      |                                                                                      |                                                                                       |
|-----|------|--------------|-----------------------------------------------------------------------------------------------------------|----------|------|--------------------------------------------------------------------------------------|---------------------------------------------------------------------------------------|
|     |      |              | $\pi_{\text{carb}} \rightarrow d_{\text{Fe}}$                                                             | $\beta$  | 0.32 | 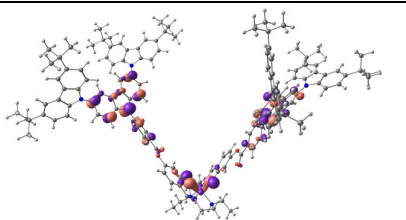   |    |
|     |      |              | $\pi_{\text{carb}} \rightarrow \pi_{\text{benz}}^*$<br>$\pi_{\text{carb}} \rightarrow d_{\text{Fe}}$      |          | 0.14 |    |    |
| 331 | 0.16 | LMCT<br>ILCT | $\pi_{\text{carb}} \rightarrow \pi_{\text{benz}}^*$<br>$\pi_{\text{carb}} \rightarrow \pi_{\text{sal}}^*$ | $\alpha$ | 0.12 |    |    |
|     |      |              | $\pi_{\text{carb}} \rightarrow d_{\text{Fe}}$                                                             | $\beta$  | 0.54 |   |   |
|     |      |              | $\pi_{\text{sal}} \rightarrow d_{\text{Fe}}$                                                              |          | 0.16 |  |  |

**Table S2.** The calculated excitation energies (absorption wavelengths), oscillator strengths, natural transition orbital (NTO) pairs and their eigenvalues (occupations) for selected excited states of the *fac* isomer (HS state).

| $\lambda$ | $f$  | Type         | Assignment                                                                                                                                                                                                                                                               | Occ      |      | NTO pair |  |
|-----------|------|--------------|--------------------------------------------------------------------------------------------------------------------------------------------------------------------------------------------------------------------------------------------------------------------------|----------|------|----------|--|
| 385       | 0.63 | ILCT         | $\pi_{\text{carb}} \rightarrow \pi_{\text{benz}}^*$<br>$\pi_{\text{carb}} \rightarrow \pi_{\text{sal}}^*$                                                                                                                                                                | $\alpha$ | 0.40 |          |  |
|           |      |              |                                                                                                                                                                                                                                                                          | $\beta$  | 0.31 |          |  |
| 357       | 0.15 | ILCT<br>LMCT | $\pi_{\text{carb}} \rightarrow \pi_{\text{sal}}^*$<br><br>$\pi_{\text{carb}} \rightarrow \pi_{\text{sal}}^*$<br>$\pi_{\text{carb}} \rightarrow d_{\text{Fe}}$                                                                                                            | $\alpha$ | 0.46 |          |  |
|           |      |              |                                                                                                                                                                                                                                                                          | $\beta$  | 0.22 |          |  |
| 338       | 0.32 | ILCT<br>LMCT | $\pi_{\text{carb}} \rightarrow \pi_{\text{sal}}^*$<br><br>$\pi_{\text{carb}} \rightarrow \pi_{\text{sal}}^*$<br>$\pi_{\text{carb}} \rightarrow d_{\text{Fe}}$<br><br>$\pi_{\text{carb}} \rightarrow \pi_{\text{benz}}^*$<br>$\pi_{\text{sal}} \rightarrow d_{\text{Fe}}$ | $\alpha$ | 0.15 |          |  |
|           |      |              |                                                                                                                                                                                                                                                                          | $\beta$  | 0.46 |          |  |
|           |      |              |                                                                                                                                                                                                                                                                          |          | 0.20 |          |  |

X-ray powder diffraction data

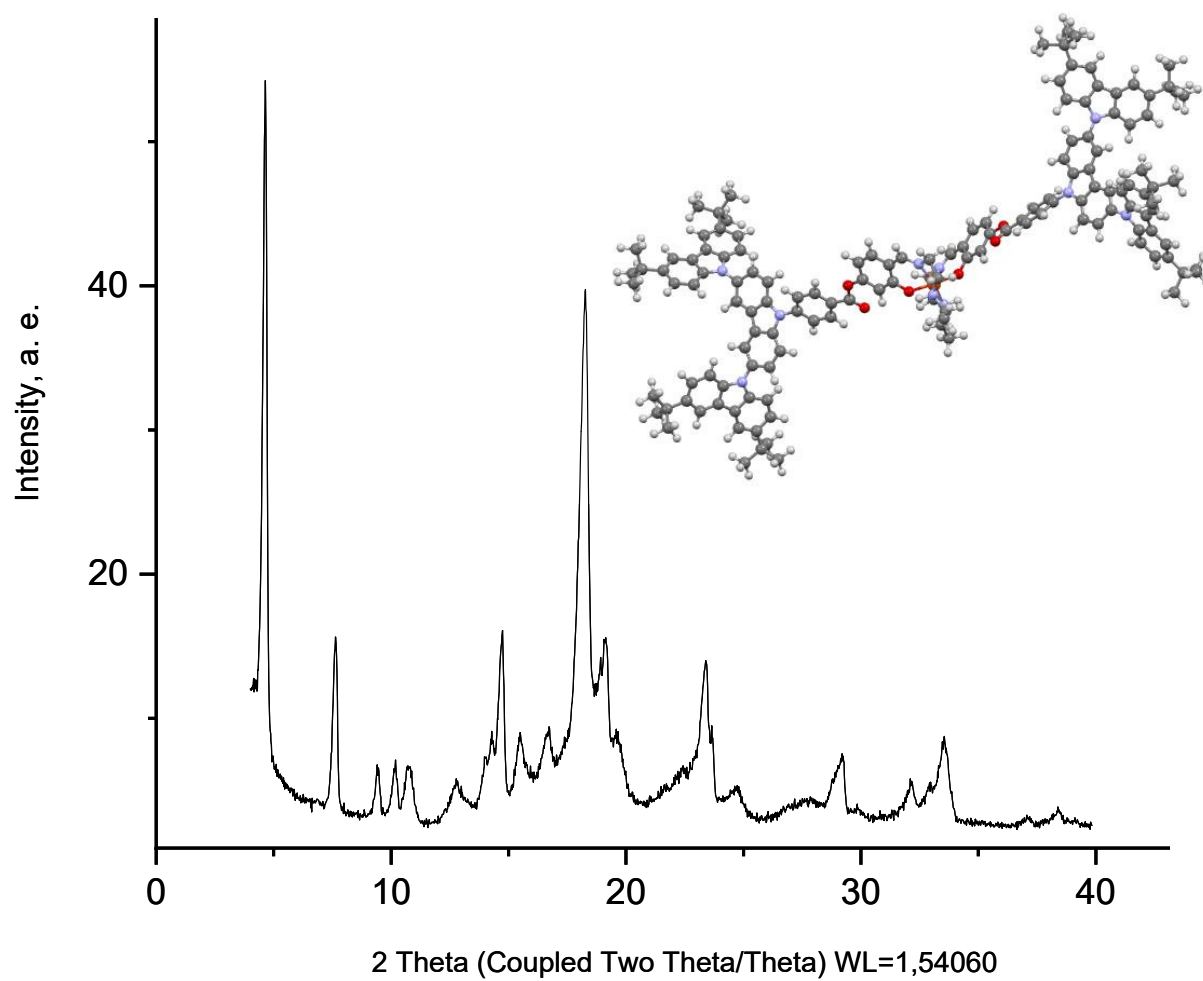

**Figure S15.** Experimental diffraction patterns of complex  $[\text{Fe}(\text{L})_2]\text{NO}_3$  (1).

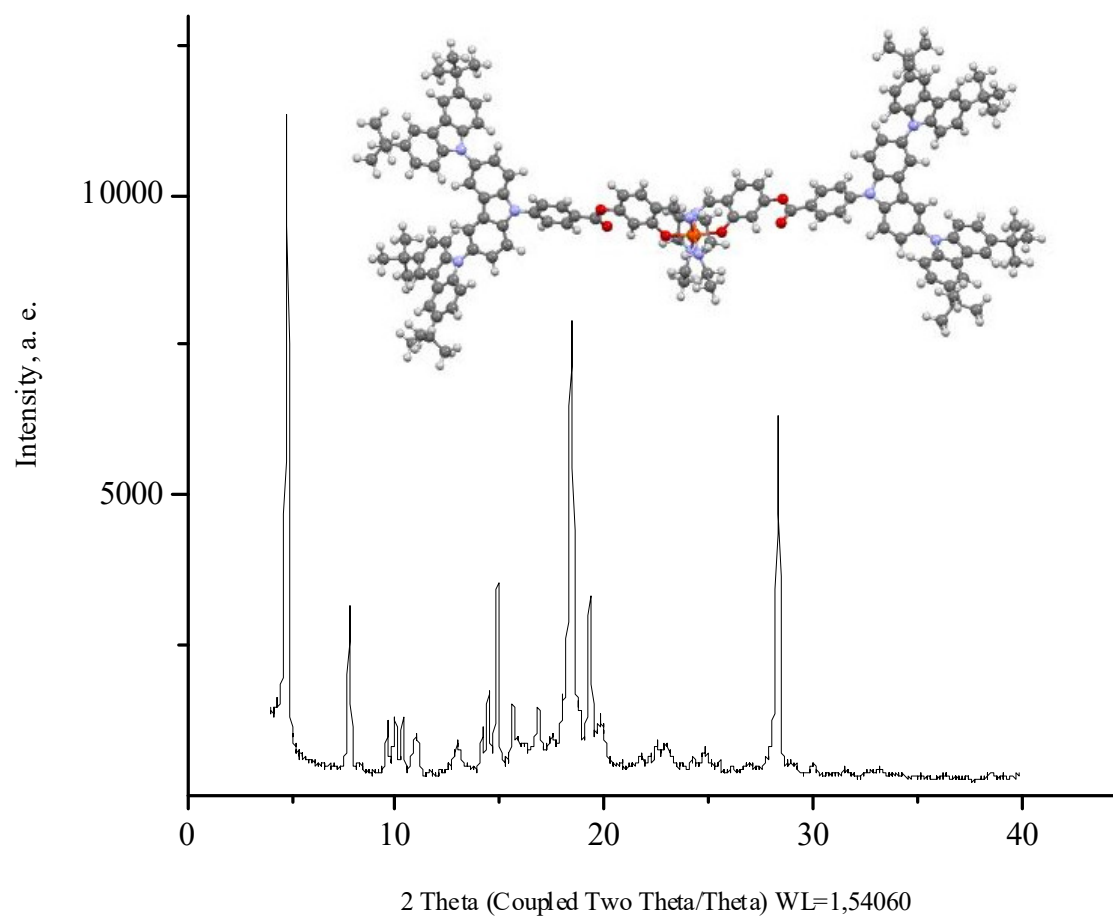

**Figure S16.** Experimental diffraction patterns of complex  $[\text{Fe}(\text{L})_2]\text{Cl}$  (**2**).

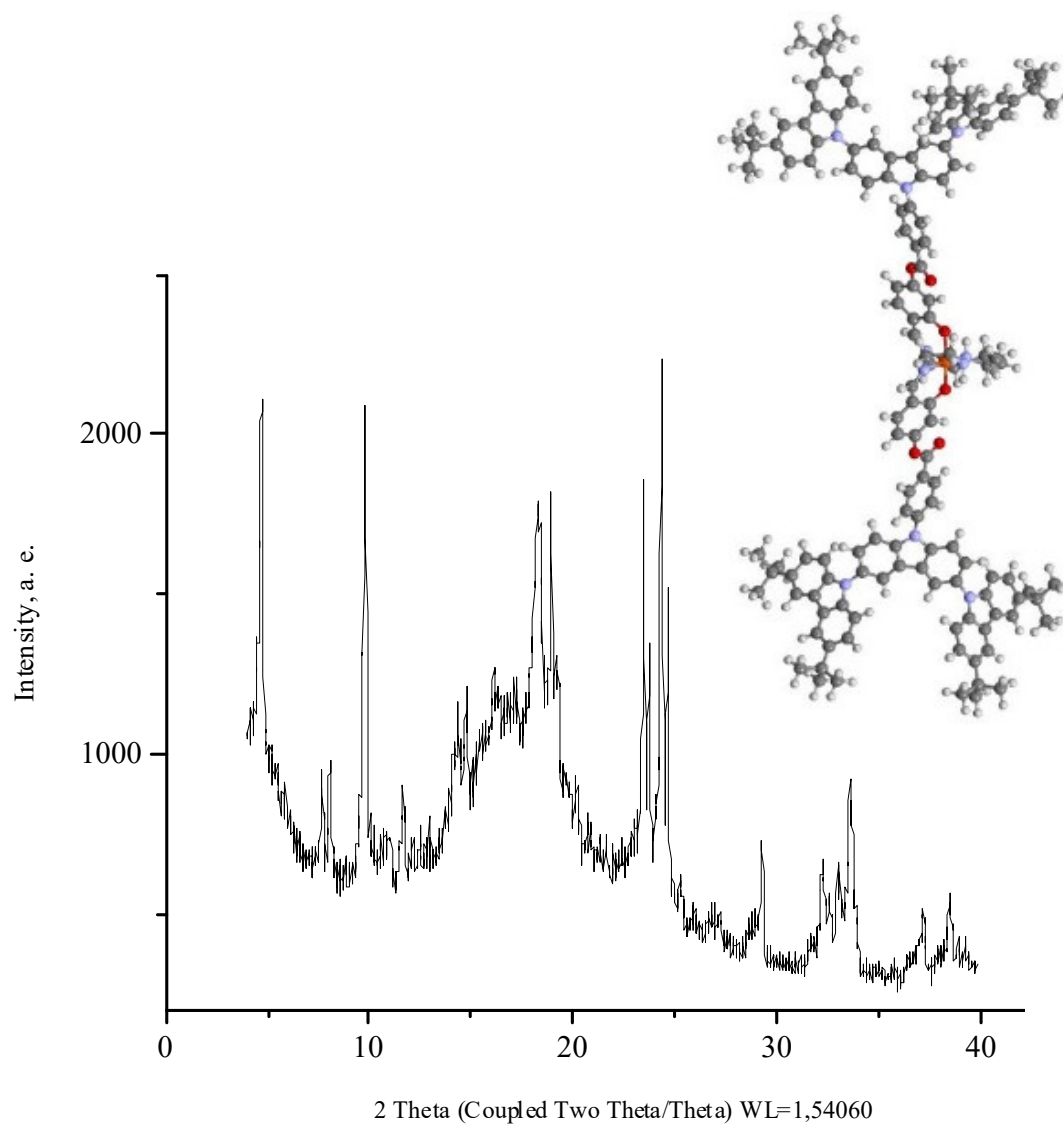

**Figure S17.** Experimental diffraction patterns of complex  $[\text{Fe}(\text{L})_2]\text{PF}_6$  (**3**).
